# Supplementary material
Source: PubMed Central journal article supplement (PMC4340598)
Supplement: NIHMS621414-supplement-1.pdf [file NIHMS621414-supplement-1.pdf]

## Supplemental Figure 1

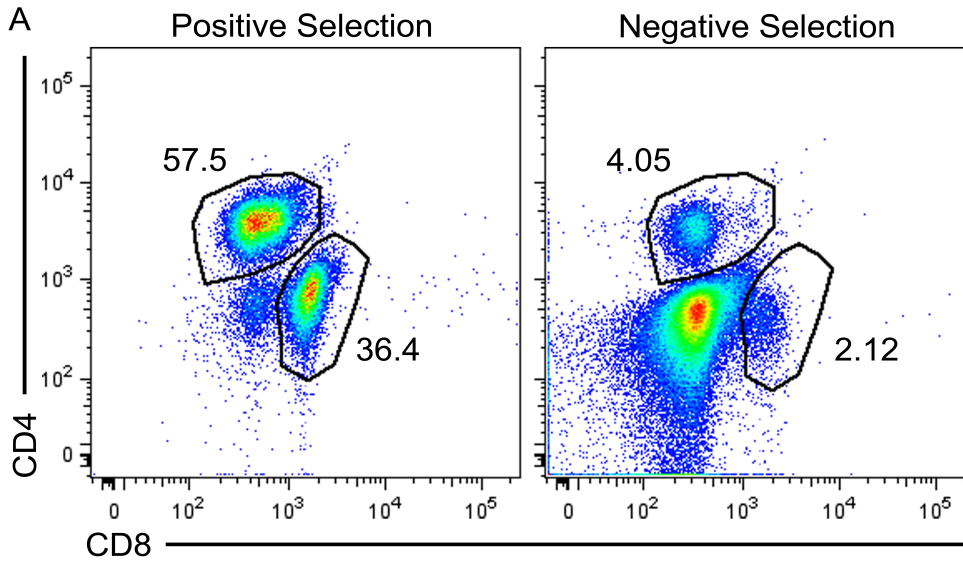

**Figure S1. Lymphocyte isolation via positive selection following WNV peptide restimulation.** CD4<sup>+</sup> and CD8<sup>+</sup> lymphocytes were obtained through positive selection (MACS) following ex vivo restimulation of splenocytes collected from WT animals on day 8 post-infection with WNV-specific immunodominant peptides. (A) The percentage of CD4<sup>+</sup> and CD8<sup>+</sup> lymphocytes obtained within the positive (left) and negative (right) selection.

## Supplemental Figure 2

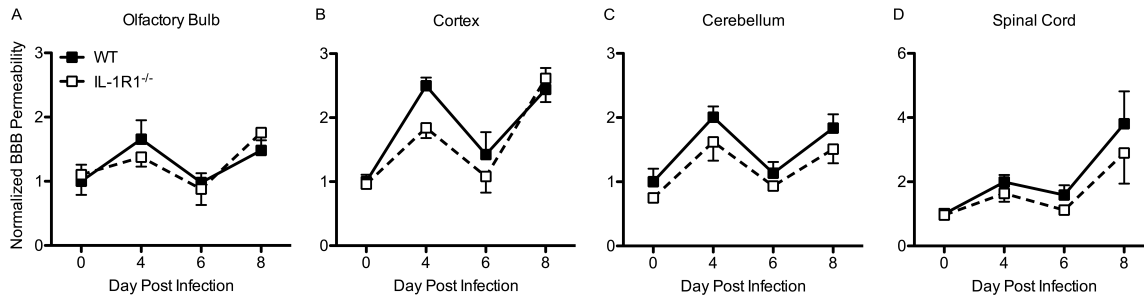

**Figure S2. IL-1 signaling has no effect on BBB permeability during WNV encephalitis.** Assessment of blood-brain barrier permeability in WNV-infected WT or IL-1R1<sup>-/-</sup> mice. Extravasation time course of sodium fluorescein (NaFluor) into the olfactory bulb (**A**), the cerebral cortex (**B**), the cerebellum (**C**), and the spinal chord (**D**) administered at indicated time points after infection with WNV in both WT (closed squares) and IL-1R1<sup>-/-</sup> animals (open squares), as measured fluorometrically. Values reported are arbitrary tissue fluorescence values normalized to serum values for individual mice. Group means are normalized to mean value for uninfected WT and IL-1R1<sup>-/-</sup> animals respectively. Data are mean values  $\pm$  S.E.M. for n = 6 mice per group/per day across 3 independent experiments.
